# Supplementary material for: Coxsackievirus A16 in Southern Vietnam
Source: PubMed Central journal article supplement (PMC8265502; doi:10.3389/fmicb.2021.689658), 2021-06-24
Supplement: Data_Sheet_1.pdf [file Data_Sheet_1.pdf]

## Supplementary Materials

**Supplementary Table 1: HFMD management guidelines according to Vietnamese Ministry of Health**

|           | <b>Classification Signs/symptoms</b>                                                                                                                                                                                                                                                                                                            | <b>Suggested Management</b>                                                                                                                                                                                                                                                                                                                                                                              |
|-----------|-------------------------------------------------------------------------------------------------------------------------------------------------------------------------------------------------------------------------------------------------------------------------------------------------------------------------------------------------|----------------------------------------------------------------------------------------------------------------------------------------------------------------------------------------------------------------------------------------------------------------------------------------------------------------------------------------------------------------------------------------------------------|
| Grade 1   | Oral ulcers and/or vesicular rash on the hands, feet, and/or the buttocks                                                                                                                                                                                                                                                                       | OPD care, with advice sheet for family<br>Careful observation for warning signs                                                                                                                                                                                                                                                                                                                          |
| Grade 2a  | Grade 1 AND<br>Myoclonic jerks observed by the family (not witnessed by medical staff)<br>Legarthy, agitation/irritability<br>Fever $\geq 39^{\circ}\text{C}$ for $\geq 48$ hours. Vomiting                                                                                                                                                     | Hospitalization<br>Oral phenobarbitone<br>Vital Signs Monitoring: every 4-6 hours following standard protocols                                                                                                                                                                                                                                                                                           |
| Grade 2b1 | Grade 1 AND<br>Myoclonic jerks witnessed by medical staff or by the family (2 jerks/30 minutes or 1 jerk and stupor)<br>Resting pulse rate $> 130/\text{min}$ but $< 150/\text{min}$ (adjusted for fever")                                                                                                                                      | Admit to HDU/PCIU<br>IV Phenobarbitone<br>Antipyretics<br>Vital Signs Monitoring: every 1-3 hours for minimum 6 hours until stable                                                                                                                                                                                                                                                                       |
| Grade 2b2 | Grade 1 AND witnessed myoclonic jerks accompanied by one of the following findings:<br>Continuous limb tremor, limb weakness<br>Or paralysis, or drowsiness (provided no hypoglycemia)<br>Resting pulse rate $> 150/\text{min}$ (adjusted for fever)<br>Fever $\geq 39.5^{\circ}\text{C}$ (rectal) and unresponsive to antipyretics $> 4$ hours | Give oxygen<br>IV Phenobarbitone<br>Antipyretics<br>Start IVIG - 2g/kg in two divided doses<br>Check: FBC, CRP, blood sugar, and consider lumbar puncture<br>Vital Signs Monitoring every 1-3 hours for $> 6$ hours                                                                                                                                                                                      |
| Grade 3   | Serious complications in CNS or Cardiopulmonary systems:<br>Pulse $> 170/\text{min}$<br>Profuse sweating<br>Stage 1 hypertension (SBP $> 95^{\text{th}}$ centile for age)<br>Respiratory abnormalities: tachypnea, labored breathing<br>Muscle hypertonia<br>Coma (Glasgow coma score $< 10$ )                                                  | Oxygenation<br>Consider need for ventilation<br>IV Phenobarbitone and IVIG<br>Milrinone if stage 2 hypertension (SBP $> 99^{\text{th}}$ for age + 5 mm Hg)<br>Dobutamine if HR $> 170$ bpm<br>Consider additional fever control measures<br>Invasive blood pressure monitoring<br>Check: FBC, CRP, blood sugar, and Consider lumbar puncture<br>Vital signs monitoring: every 30-60 minutes for 26 hours |
| Grade 4   | Severe complications:<br>Acute pulmonary edema<br>Cardiac collapse                                                                                                                                                                                                                                                                              | SpO2 $< 92\%$ with cannula oxygen 6 litres/min)<br>Respiratory arrest or gasping respiration<br>Intubation and ventilation<br>IV Phenobarbitone<br>Dobutamine; Fluid challenge<br>Antipyretics,<br>Access CVC plus invasive BP monitoring<br>Vital signs monitoring: every 15-30 mins for 26 hours                                                                                                       |

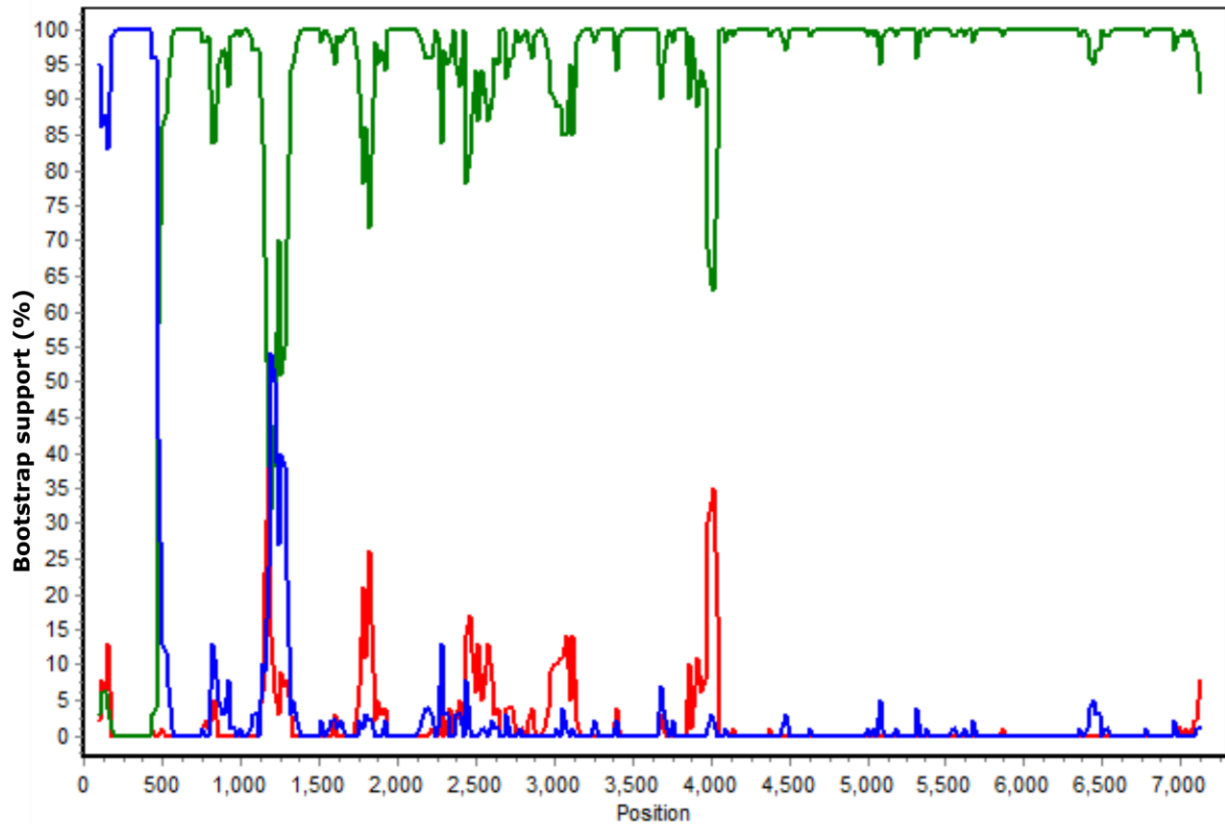

**Supplementary Figure 1:** Bootscan analysis showing the recombinant CVA16

**Note Supplementary Figure 1:** Green color indicates the recombinant CVA16 strain obtained from the present study, while red and blue colors indicate reference strains (GenBank accession numbers: KX768156 and KF193624, respectively).

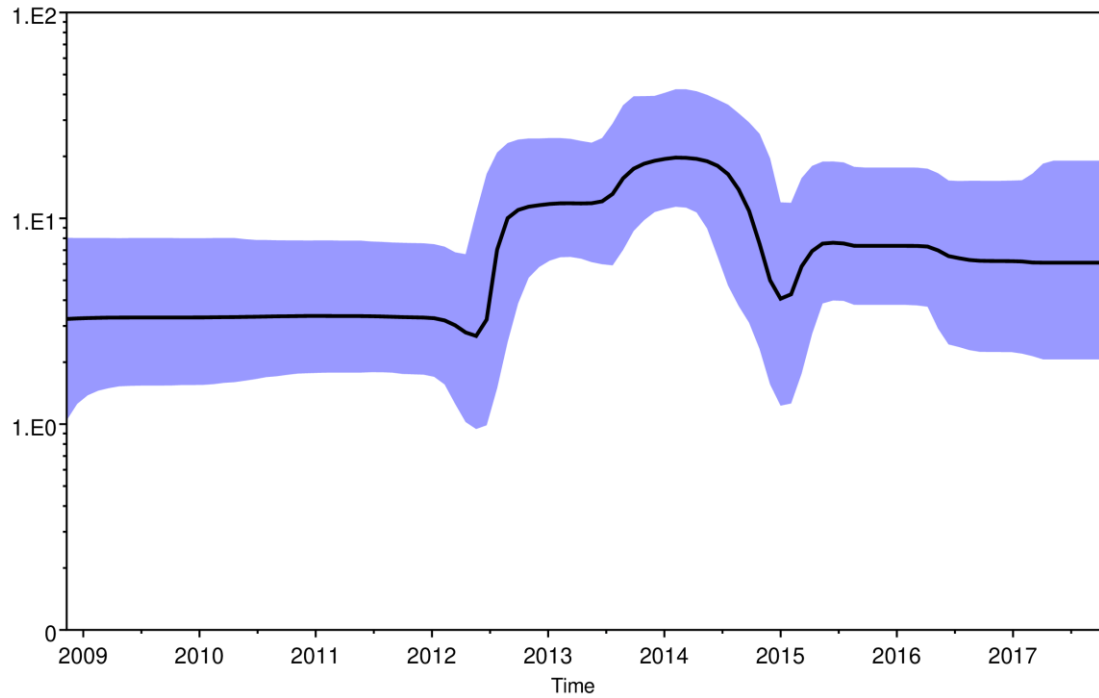

**Supplementary Figure 2:** Estimated relative genetic diversity of CVA16 in Vietnam by Bayesian skyline plot using CDS dataset

**Note to Figure 2:** The analysis was done for 68 CDS. The estimated substitution rate was  $4.6 \times 10^{-3}$  ( $4.21 - 5.02 \times 10^{-3}$ ) substitutions per site per year. The estimated time to most recent common ancestor was Apr 2008 (Aug 2007 - Oct 2008)

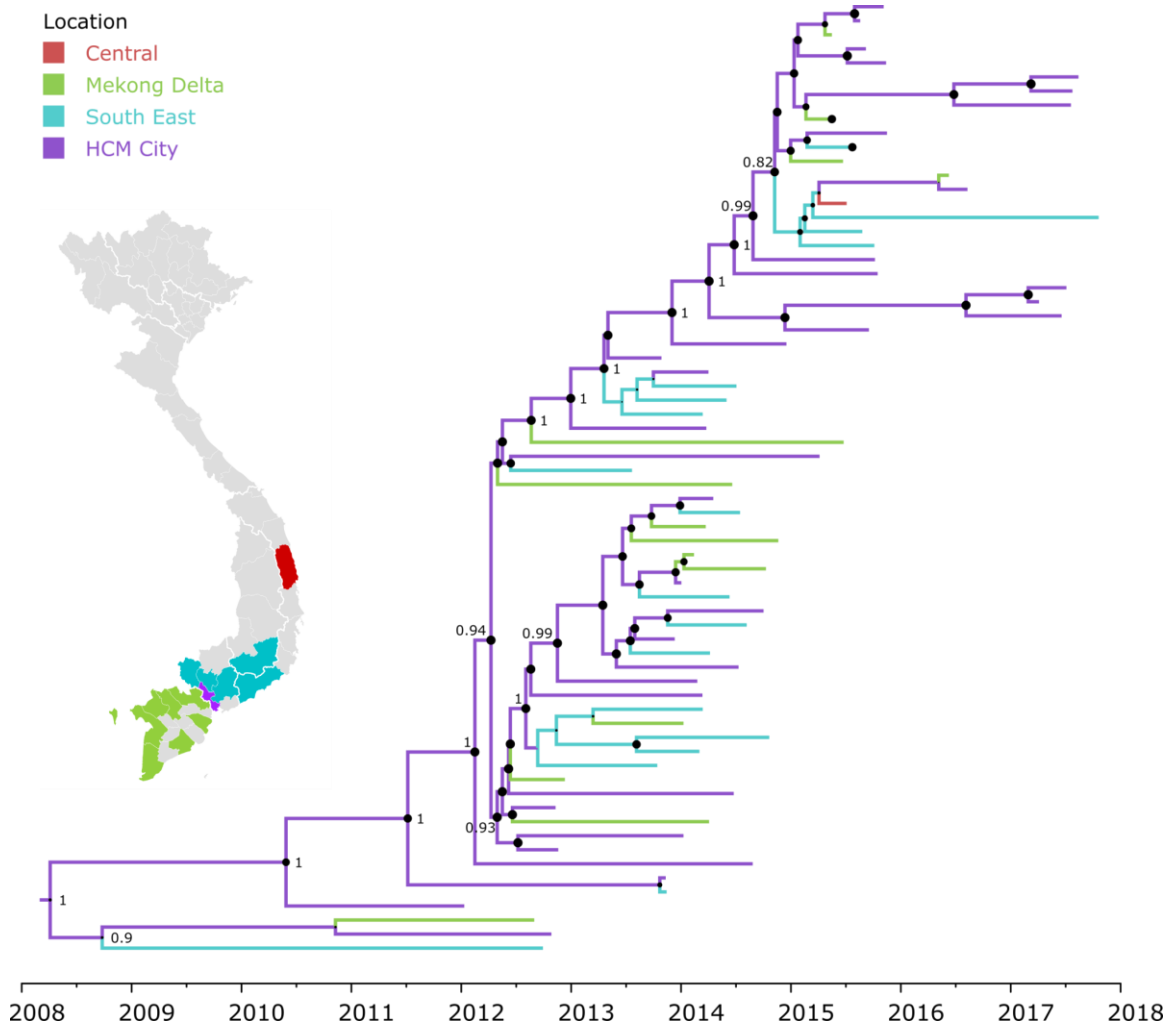

**Supplementary Figure 3:** CDS based maximum clade credibility trees demonstrating the phylogeography of CVA16 isolates in Vietnam
